# Supplementary material for: Prognostic Factors in Non-Occlusive Mesenteric Ischemia: A Pragmatic Pre-Operative Score for the Prediction of 28-day Mortality
Source: Research Square preprint supplement (doi:10.21203/rs.3.rs-455604/v1), 2021-04-29
Supplement: Supplementary file 1 [file 09cbece4c12a061029b4662a.docx]

**SUPPLEMENTARY FIGURE 1.** Nomogram for predicting 28-day survival probabilities of patients with non-occlusive mesenteric ischemia.

**
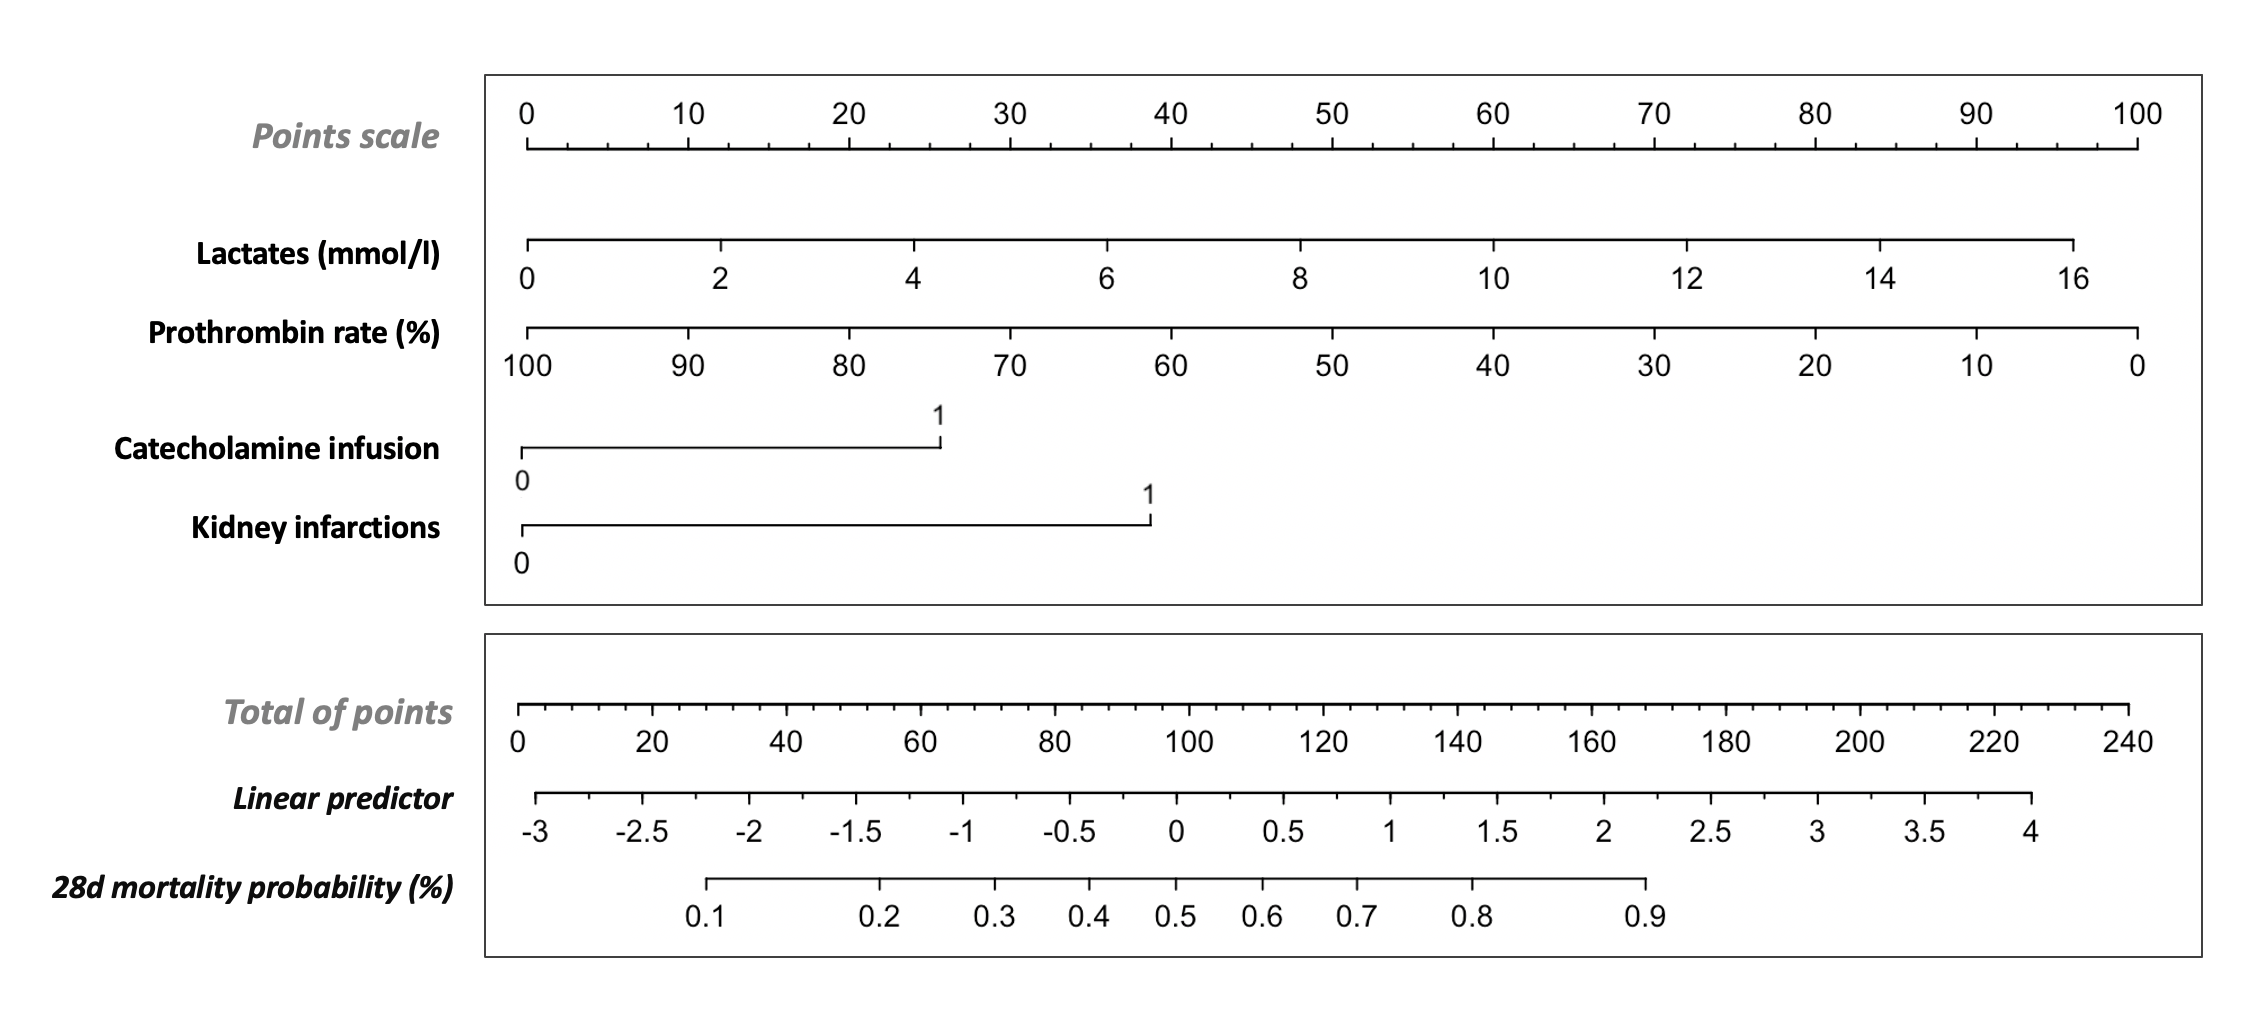
**
