# Supplementary material for: Prognostic Factors in Non-Occlusive Mesenteric Ischemia: A Pragmatic Pre-Operative Score for the Prediction of 28-day Mortality
Source: Research Square preprint supplement (doi:10.21203/rs.3.rs-455604/v1), 2021-04-29
Supplement: Supplementary file 2 [file 09e4bb8f7b3feecdcac60d7e.docx]

**SUPPLEMENTARY FIGURE 3.** Survival probability curves (Kaplan–Meier method) according to operative findings.

**
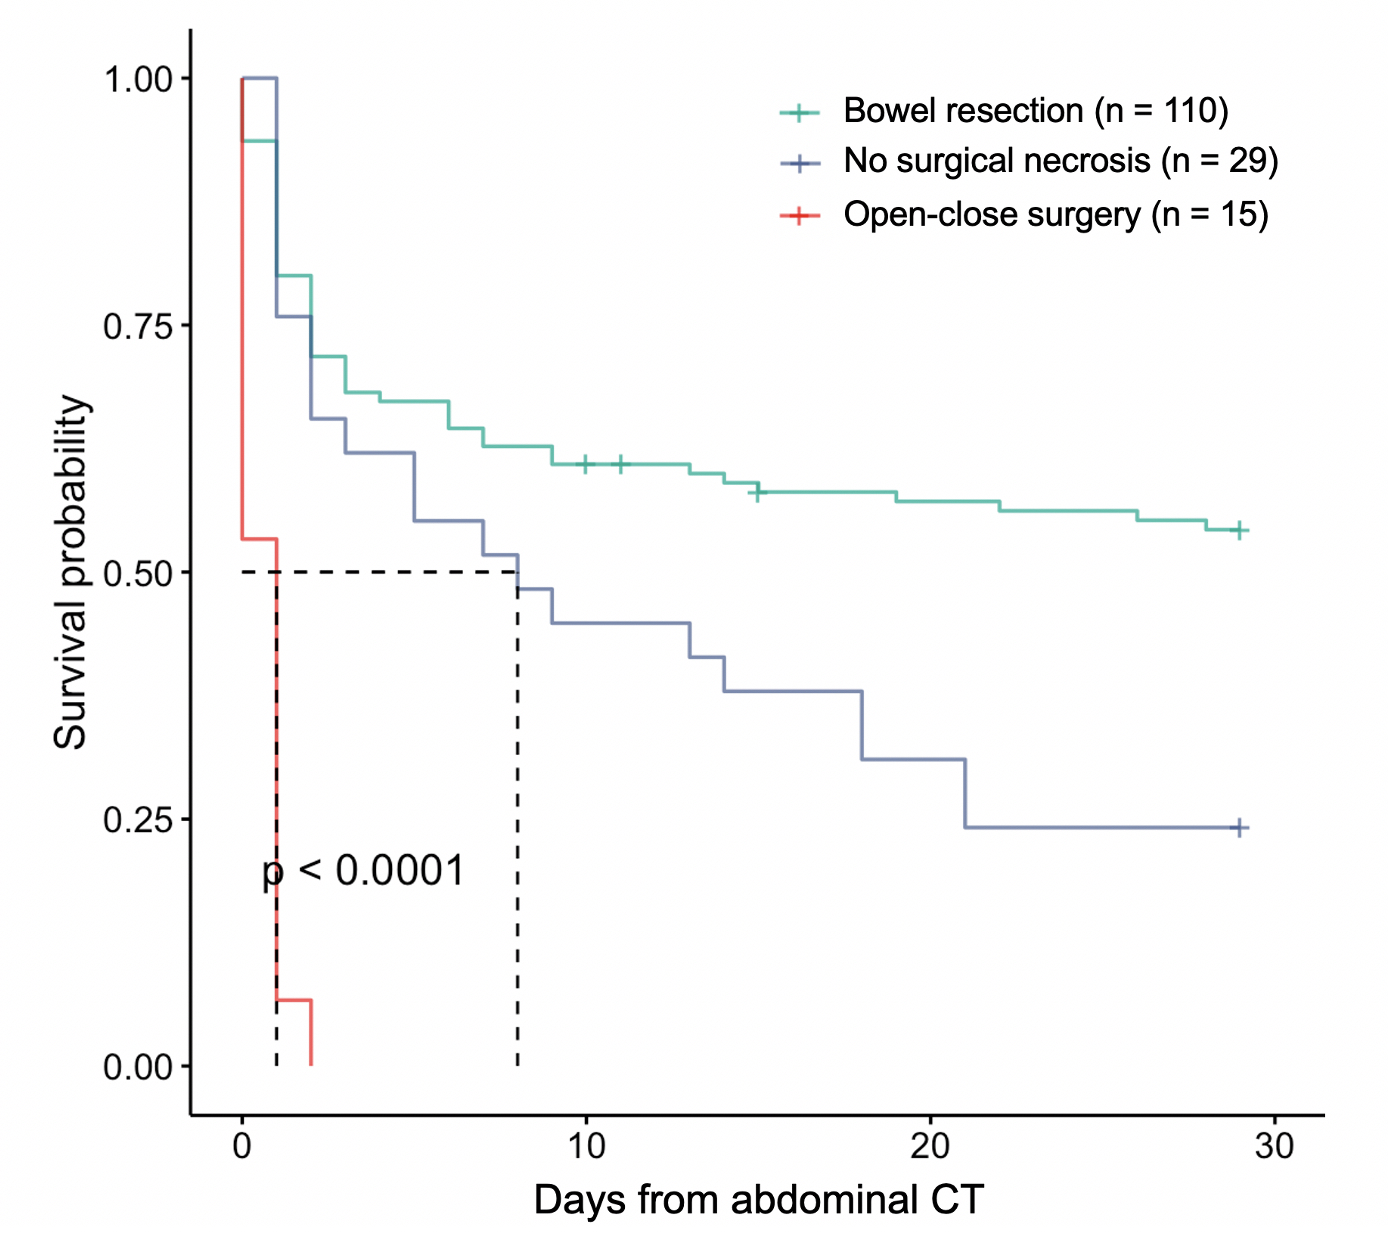
**
